# Supplementary material for: Controllable fabrication of mono-dispersed RGO–hematite nanocomposites and their enhanced wave absorption properties
Source: Royal Society of Chemistry journal article supplement (doi:10.1039/c3ta10664k), 2013-01-01
Supplement: c3ta10664k.pdf [file c3ta10664k.pdf]

## Supporting Information

# Controllable Fabrication of Mono-dispersed RGO/Hematite Nanocomposites and Their Enhanced Wave Absorption Property

Dezhi Chen,<sup>a,c</sup> Guang-Sheng Wang,<sup>\*a</sup> Shuai He<sup>a</sup>, Jia Liu<sup>b</sup>, Lin Guo<sup>\*a</sup> and Mao-Sheng Cao<sup>b\*</sup>

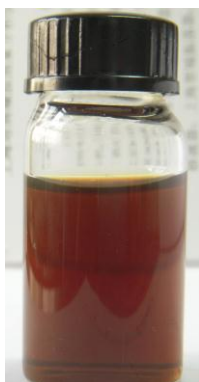

**Fig. S1.** Typical digital photograph of 1mg/mL GO suspension.

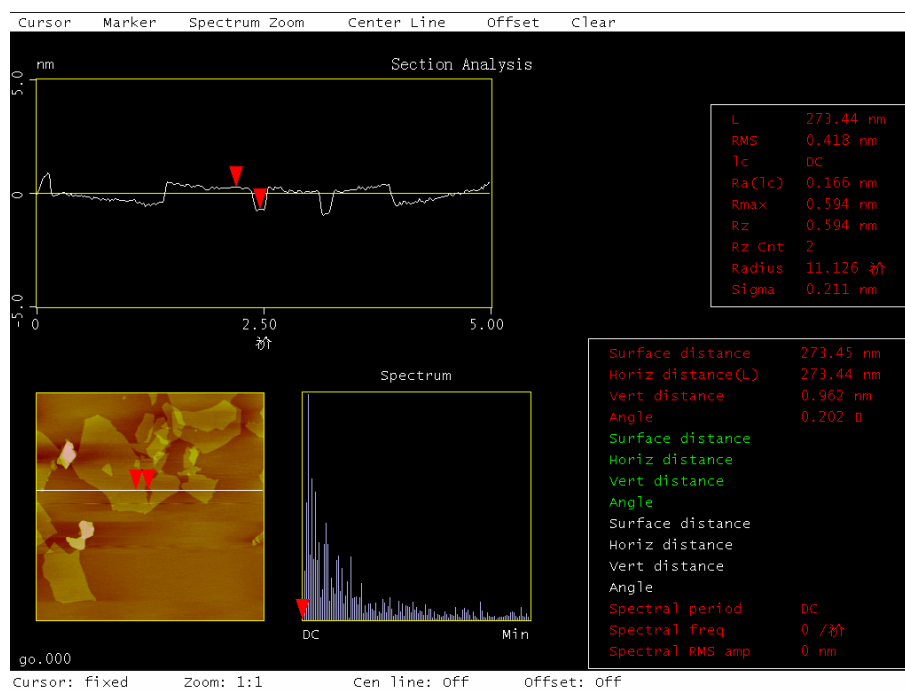

**Fig. S2.** AFM image and the section analysis of GO nanosheets on mica.

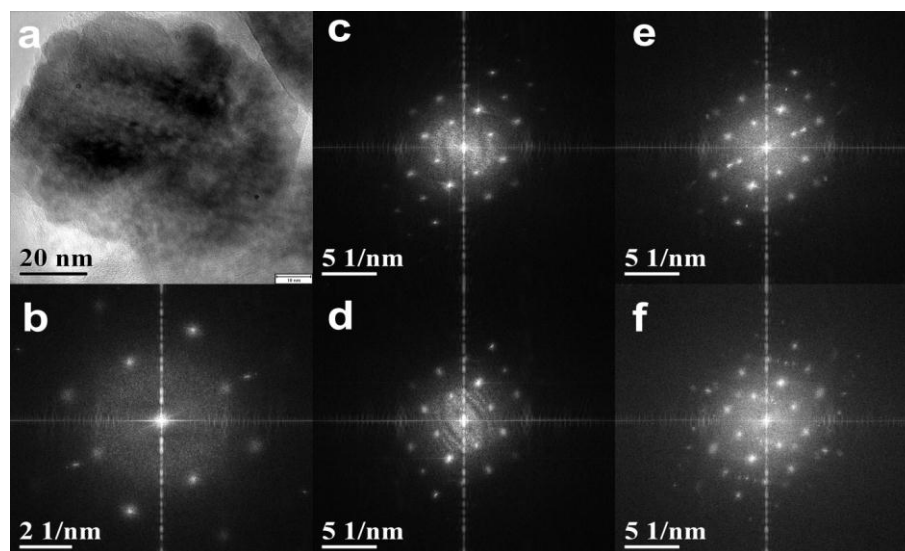

**Fig. S3.** (a) Typical TEM image of individual hematite particle and (b) the corresponding fast Fourier transform (FFT) result; (c, d, e and d) FFT) result of Fig. 3 c, d, e and d.

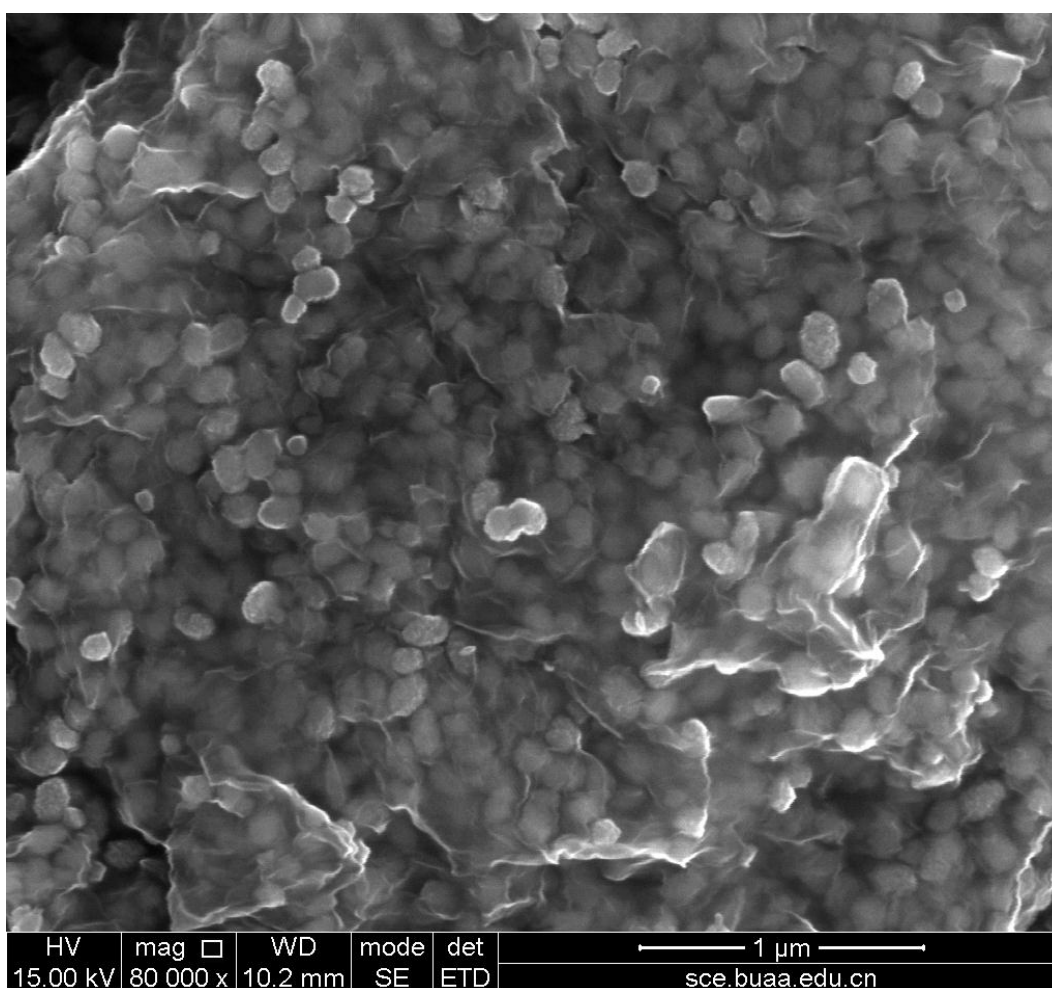

**Fig. S4.** Typical SEM image of the N-RGO/hematite.

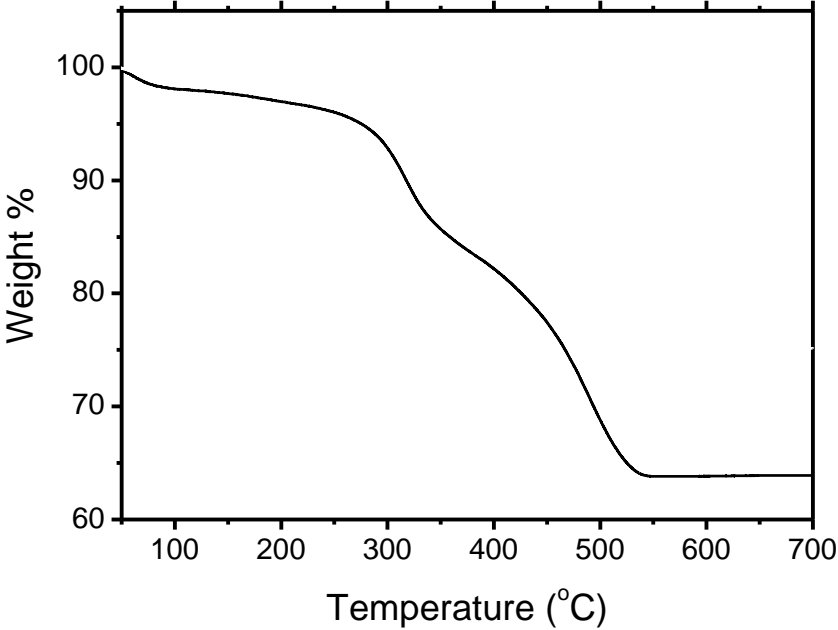

**Fig. S5.** TG curves of the N-RGO/hematite.
